# Supplementary material for: Evidence for a compact object in the aftermath of the extragalactic transient AT2018cow
Source: Springer Nature journal article supplement (doi:10.1038/s41550-021-01524-8), 2021-12-13
Supplement: 41550_2021_1524_MOESM1_ESM.pdf [file 41550_2021_1524_MOESM1_ESM.pdf]

---

**Supplementary information**

---

**Evidence for a compact object in the  
aftermath of the extragalactic transient  
AT2018cow**

---

In the format provided by the  
authors and unedited

Evidence for a Compact Object in the Aftermath of the  
Extragalactic Transient AT2018cow

Dheeraj R. Pasham<sup>1\*</sup>, Wynn C. G. Ho<sup>2</sup>, William Alston<sup>3</sup>, Ronald Remillard<sup>1</sup>,  
Mason Ng<sup>1</sup>, Keith Gendreau<sup>4</sup>, Brian D. Metzger<sup>5</sup>, Diego Altamirano<sup>6</sup>,  
Deepto Chakrabarty<sup>1</sup>, Andrew Fabian<sup>7</sup>, Jon Miller<sup>8</sup>, Peter Bult<sup>4,9</sup>,  
Zaven Arzoumanian<sup>4</sup>, James F. Steiner<sup>10</sup> Tod Strohmayer<sup>4</sup>,  
Francesco Tombesi<sup>4,9,11,12</sup>, Jeroen Homan<sup>13</sup>, Edward M. Cackett<sup>14</sup>, Alice Harding<sup>15</sup>

<sup>1</sup>Kavli Institute for Astrophysics and Space Research, Massachusetts Institute of Technology,  
Cambridge, MA 02139, USA

<sup>2</sup>Department of Physics and Astronomy, Haverford College, 370 Lancaster Avenue,  
Haverford, PA 19041, USA

<sup>3</sup>European Space Agency (ESA), European Space Astronomy Centre (ESAC),  
Villanueva de la Cañada, Madrid, E-28691, Spain

<sup>4</sup>NASA Goddard Space Flight Center, Greenbelt, MD, USA

<sup>5</sup>Columbia Astrophysics Laboratory, Columbia University, New York, NY 10027, USA

<sup>6</sup>Department of Physics and astronomy, University of Southampton,  
University Road, Southampton, SO17 1BJ, UK

<sup>7</sup>Institute of Astronomy, University of Cambridge, UK

<sup>8</sup>Department of Astronomy, 311 West Hall, 1085 South University Ave.,  
Ann Arbor, MI 48109-1107

<sup>9</sup>Department of astronomy, University of Maryland College Park, MD, 20742

<sup>10</sup>Center for Astrophysics, Harvard & Smithsonian, Cambridge, MA, 02138

<sup>11</sup>Department of Physics, Tor Vergata University of Rome, Via della Ricerca Scientifica 1,  
00133 Rome, Italy

<sup>12</sup>INAF – Astronomical Observatory of Rome, Via Frascati 33, 00040 Monte Porzio Catone, Italy

<sup>13</sup>Eureka Scientific, Inc., Oakland, CA 94602, USA

<sup>14</sup>Department of Physics and Astronomy, Wayne State University, 666 W Hancock,  
Detroit, MI 48201

<sup>15</sup>Theoretical Division, Los Alamos National Laboratory, Los Alamos, NM 87545

\*To whom correspondence should be addressed; E-mail: dheeraj@space.mit.edu

Supplementary Table 1: Upper limits on the fractional rms value of QPOs at various integer harmonics of 224 Hz (see Supplementary Figure 1).

| <b>Frequency range<sup>•</sup></b>   | <b>rms upper limit<br/>(coherence=5)<sup>†</sup></b> | <b>rms upper limit<br/>(coherence=10)<sup>†</sup></b> | <b>rms upper limit<br/>(coherence=20)<sup>†</sup></b> |
|--------------------------------------|------------------------------------------------------|-------------------------------------------------------|-------------------------------------------------------|
| $\frac{1}{2} \times (224 \pm 16)$ Hz | 30                                                   | 25                                                    | 23                                                    |
| $\frac{3}{2} \times (224 \pm 16)$ Hz | 41                                                   | 32                                                    | 27                                                    |
| $2 \times (224 \pm 16)$ Hz           | 42                                                   | 36                                                    | 30                                                    |

<sup>•</sup>The frequency range where the rms upper limit is computed. <sup>†</sup>The rms upper limit is computed for three different coherence (QPO centroid/QPO width).

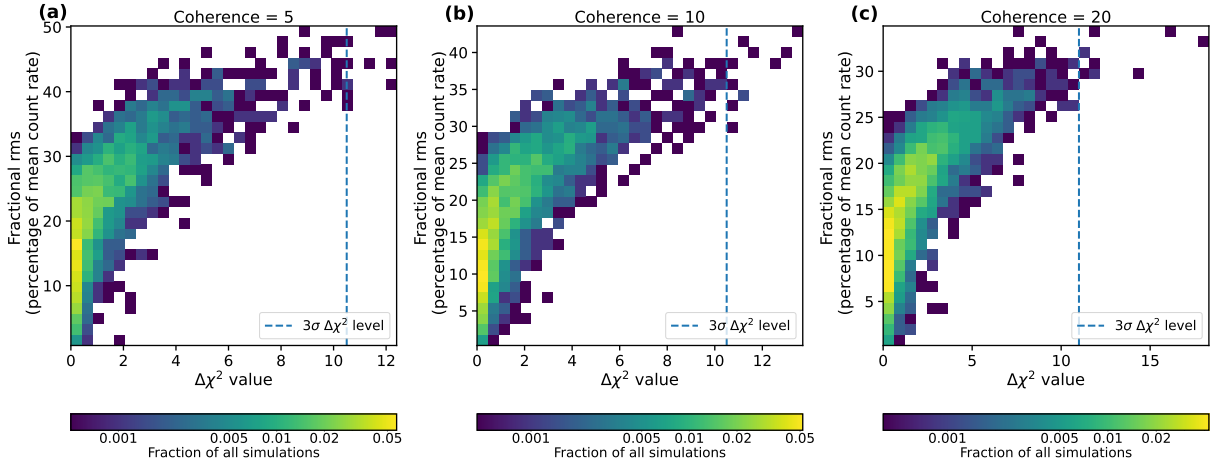

Supplementary Figure 1: **2-D histograms of  $\Delta\chi^2$  improvement (constant vs constant + Lorentzian) vs corresponding fractional rms of a QPO-like feature at half the observed frequency, i.e., between 104-120 Hz.** These were derived using simulations (See sec. 3 of Methods for more details). The dashed vertical line in each panel corresponds to the  $3\sigma$  (99.73%) level. The upper limit on fractional rms corresponds to the intersection of the histogram with the  $3\sigma$  vertical line (see Supplementary Table. 1). The three panels correspond to three different coherence values (centroid frequency/width) of a QPO-like feature between 104 and 120 Hz.
